# Supplementary material for: Raman Study of Block Copolymers of Methyl Ethylene Phosphate with Caprolactone and L-lactide
Source: MDPI journal article supplement (doi:10.3390/polym14245367), 2022-12-08
Supplement: s1 [file s1]

## *Supplementary Materials*

### **Raman Study of Block Copolymers of Methyl Ethylene Phosphate with Caprolactone and L-lactide**

S.O. Liubimovskii, V.S. Novikov, A.V. Shlyakhtin, V.V. Kuzmin, M.M. Godyaeva, S.V. Gudkov, E.A. Sagitova, L.Yu. Ustynyuk, G.Yu. Nikolaeva

#### **S1. Synthesis**

##### **Synthesis of mPEG<sub>2000</sub>—b—PCL copolymers**

A preheated glass ampoule of a required volume was equipped with a magnetic stir bar, 1.00 g mPEG<sub>2000</sub> (1 eq.) was placed into the ampule and then the ampule was filled with dry argon and closed with a septum. Then, 5.0 ml CH<sub>2</sub>Cl<sub>2</sub> was added, and after mPEG dissolution, 0.5 ml 1M stock solution in THF of M1 catalyst ( $5 \times 10^{-4}$  mol, 1 eq.) was added at 5 °C. After 4 h of stirring at room temperature, 47 ml of dry CH<sub>2</sub>Cl<sub>2</sub> was added for **PCL5** sample (66 ml for **PCL6** sample, 20 ml for **PCL4** sample, in order to provide approx. 2M of CL concentration), and then the required amount of CL (0.12 mol (240 eq.) for **PCL5**, 0.17 mol (340 eq.) for **PCL6**, 0.05 mol (100 eq.) for **PCL4**) was added. After 18 h of stirring at room temperature, the reaction mixture was neutralized with an excess of acetic acid, diluted with CH<sub>2</sub>Cl<sub>2</sub>, and was precipitated twice in diethyl ether and subsequently dried in vacuo. The yield was 11.7 g (80 %) for **PCL5**, 15.6 g (76 %) for **PCL6**, 4.7 g (70 %) for **PCL4**. The <sup>1</sup>H NMR spectra of the copolymers are presented in Figure S1.

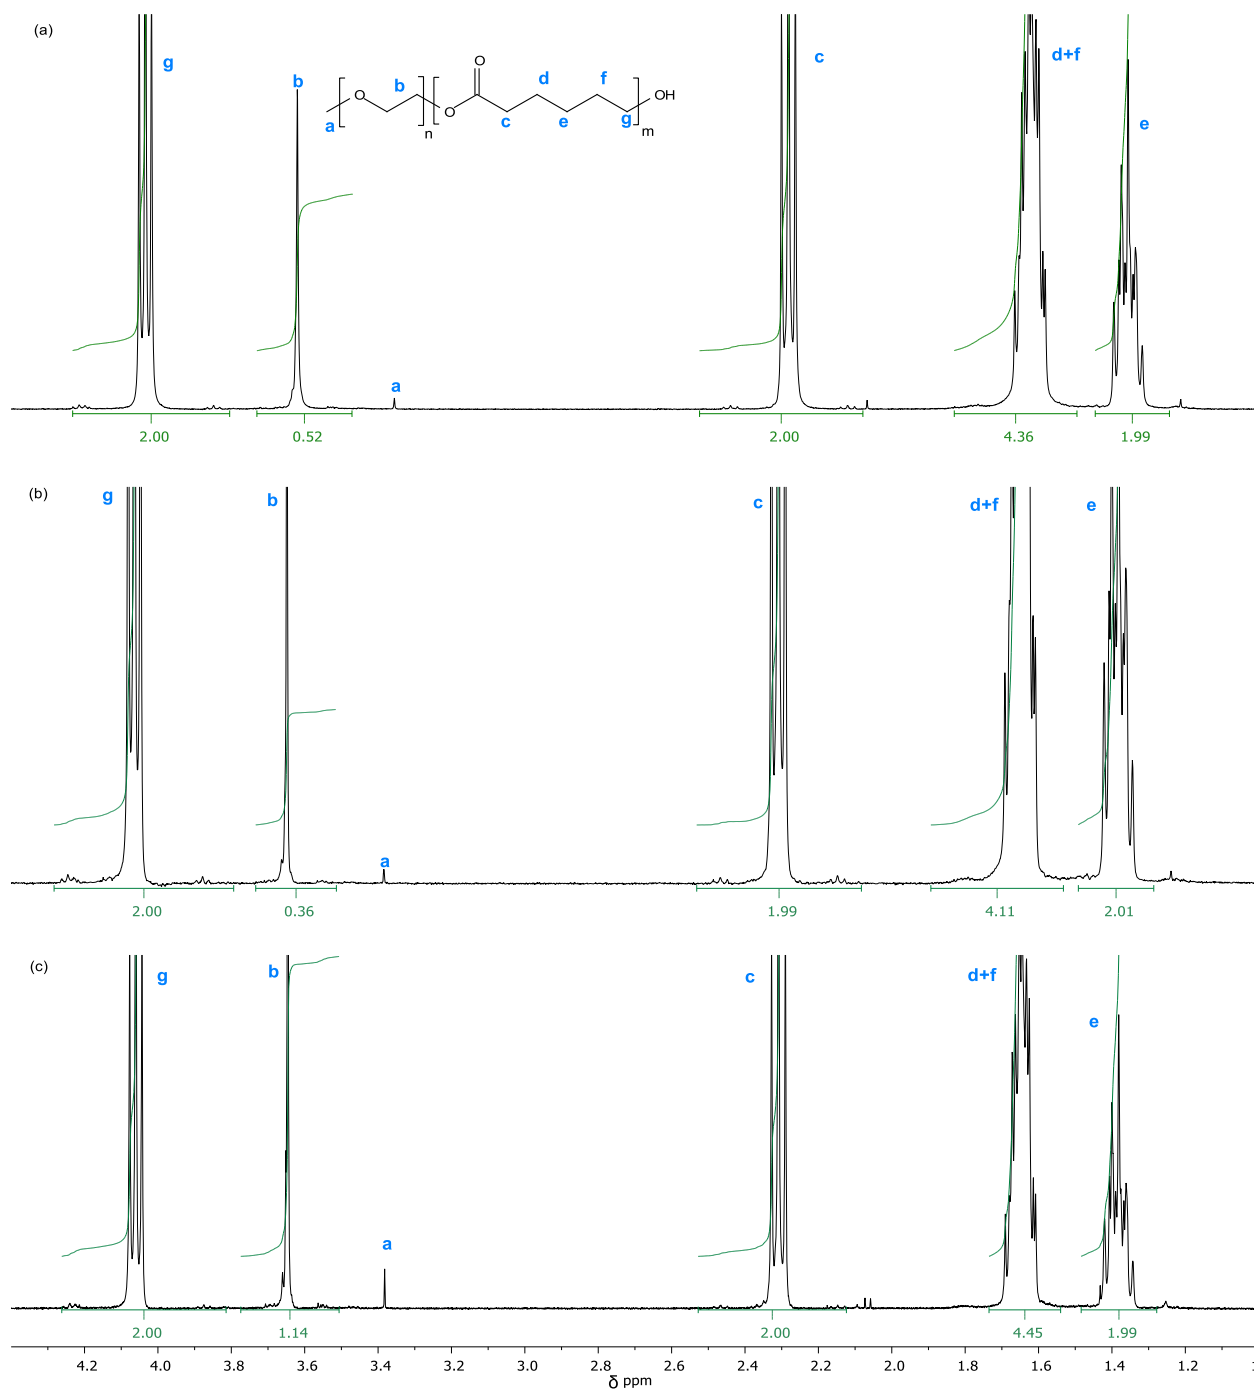

**Figure S1:**  $^1\text{H}$  NMR spectra of mPEG<sub>2000</sub>-b-PCL copolymers **PCL5** (a), **PCL6** (b), **PCL4** (c). The signals of the protons of copolymers fragments are marked as letters.

#### Synthesis of mPEG<sub>5000</sub>-b-PCL copolymer

A preheated 30 ml glass ampoule was equipped with a magnetic stir bar, 1.00 g mPEG<sub>5000</sub> (1 eq) was placed into the ampoule and then the ampoule was filled with dry argon and closed with a septum. Then, 5.0 ml  $\text{CH}_2\text{Cl}_2$  was added, and after mPEG dissolution, 0.2 ml of 1M stock solution in THF of M1 catalyst ( $2 \times 10^{-4}$  mol, 1 eq) was added. After 4 h of stirring, 8 ml of dry  $\text{CH}_2\text{Cl}_2$  and 0.02 mol (100 eq) of CL were added consequently. After 18 h of stirring at room temperature, the reaction mixture was neutralized with an excess of acetic acid, diluted with  $\text{CH}_2\text{Cl}_2$ , and was precipitated twice in diethyl ether and subsequently dried in vacuo. The yield was 1.9 g (58 %). The  $^1\text{H}$  NMR spectra of copolymer **PCL1** are presented in Figure S2.

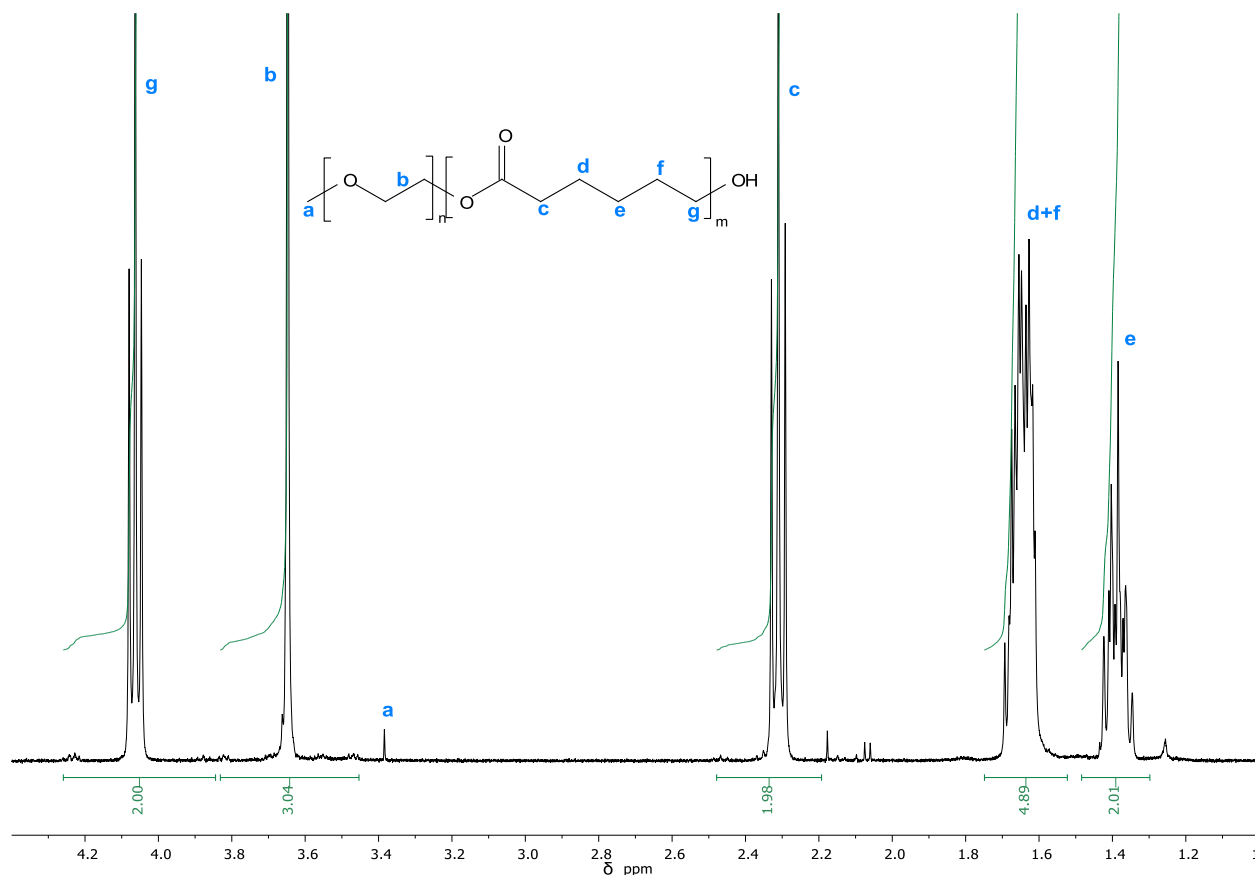

**Figure S2:**  $^1\text{H}$  NMR spectrum of mPEG<sub>5000</sub>—b—PCL copolymer (PCL1). The signals of the protons of copolymer fragments are marked as letters.

#### Synthesis of mPEG<sub>550</sub>—b—PCL—b—PMeOEP copolymer 23% PMeOEP

A preheated 100 ml glass ampoule was equipped with a magnetic stir bar, 0.50 g mPEG<sub>550</sub> ( $9.1 \times 10^{-4}$  mol, 1 eq.) was placed into the ampule and then the ampule was filled with dry argon and closed with a septum. Then, 5.0 ml  $\text{CH}_2\text{Cl}_2$  was added, then 0.9 ml of 1M stock solution in THF of M1 catalyst ( $9.1 \times 10^{-4}$  mol, 1 eq.). After 4 h of stirring, 29 ml of dry  $\text{CH}_2\text{Cl}_2$  was added (to provide approx. 2M of CL concentration), and then 0.091 mol (10.38 g, 10.1 ml, 100 eq.) of CL were added. After 4 h of stirring, MeOEP (0.091 mol, 12.55 g, 9.09 ml, 100 eq.) was added to the reaction mixture. After 4 h of additional stirring, the reaction mixture was neutralized with an excess of acetic acid, polymer solution was precipitated twice in diethyl ether and subsequently dried in vacuo. The yield was 16.3 g (69 %). The  $^1\text{H}$  and  $^{31}\text{P}$  NMR spectra of the copolymer are presented in Figure S3a.

#### Synthesis of mPEG<sub>550</sub>—b—PCL—b—PMeOEP copolymer 86% PMeOEP

A preheated 50 ml glass ampoule was equipped with a magnetic stir bar, 0.50 g mPEG<sub>550</sub> ( $9.1 \times 10^{-4}$  mol, 1 eq.) was placed into the ampule and then the ampule was filled with dry argon and closed with a septum. Then, 5.0 ml  $\text{CH}_2\text{Cl}_2$  was added, then 0.9 ml of 1M stock solution in THF of M1 catalyst ( $9.1 \times 10^{-4}$  mol, 1 eq.). After 4 h of stirring, 0.0091 mol (1.04 g, 1.01 ml, 10 eq.) of CL were added. After 4 h of stirring, MeOEP (0.027 mol, 3.73 g, 2.70 ml, 30 eq.) was added to the reaction mixture. After 4 h of additional stirring, the reaction mixture was neutralized with an excess of acetic acid, polymer solution was precipitated twice in diethyl ether and subsequently dried in vacuo. The yield was 2.5 g (59 %). The  $^1\text{H}$  and  $^{31}\text{P}$  NMR spectra of the copolymer are presented in Figure S3b.

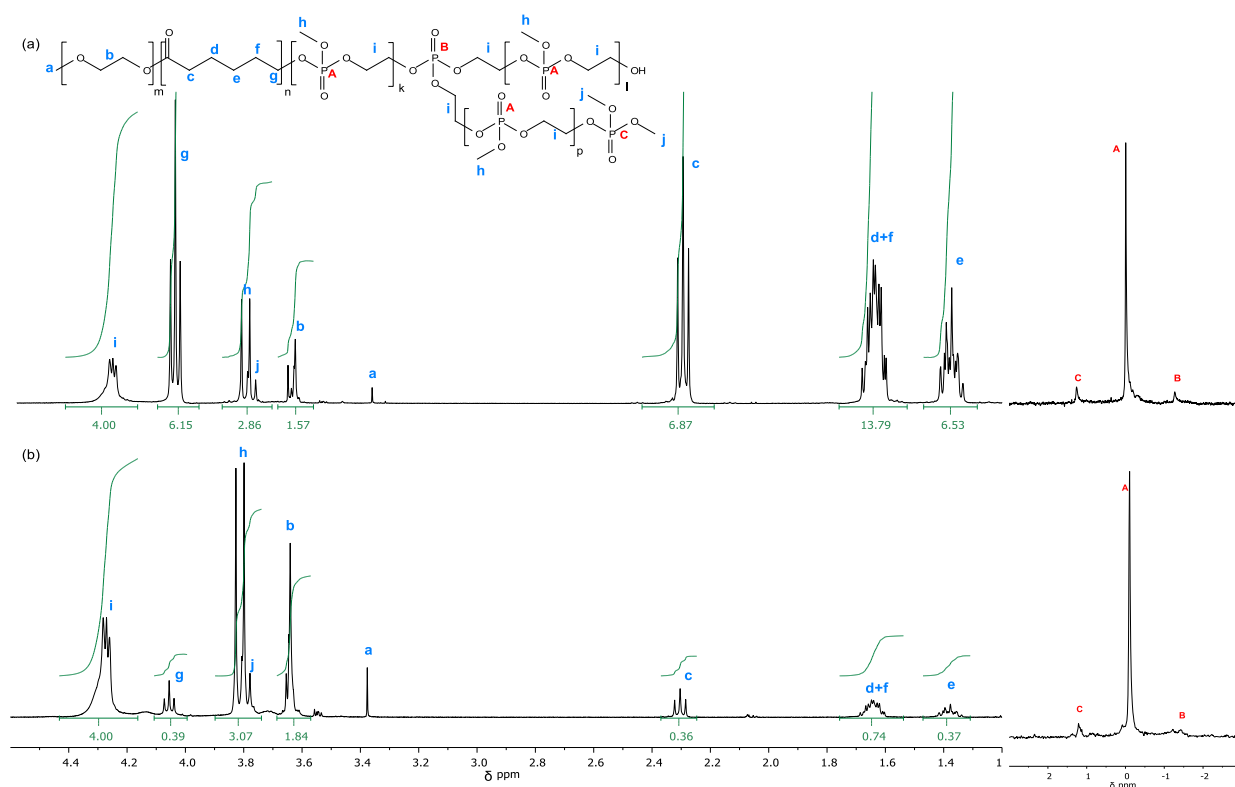

**Figure S3:**  $^1\text{H}$ ,  $^{31}\text{P}$  NMR spectra of mPEG<sub>5000</sub>-b-PCL-b-PMeOEP copolymers **23% PMeOEP** (a), **86% PMeOEP** (b). The signals of the protons and phosphorus atoms of copolymers fragments are marked as letters.

### Synthesis of polycaprolactone PCL3

CL (1.31 ml, 1.35 g, 11.8 mmol, 100 eq.) was placed into the preheated 30 ml glass ampule, equipped with a magnetic stir bar and septum, THF (3.6 ml) was added. The reaction mixture was cooled to 5 °C, and a solution of 50 mg [(BHT)Mg( $\mu$ -Obn)(THF)]<sub>2</sub> (cat M2,  $1.18 \times 10^{-4}$  mol Mg, 1 eq.) in THF (1.0 ml) was added (resulting concentration of CL was 2M). After 8 h of stirring at room temperature, the reaction mixture was neutralized with a 5-fold excess of acetic acid, diluted with dichloromethane, precipitated in diethyl ether twice and dried in vacuo. The yield was 1.19 g (88 %). The  $^1\text{H}$  NMR spectrum is presented in Figure S4.

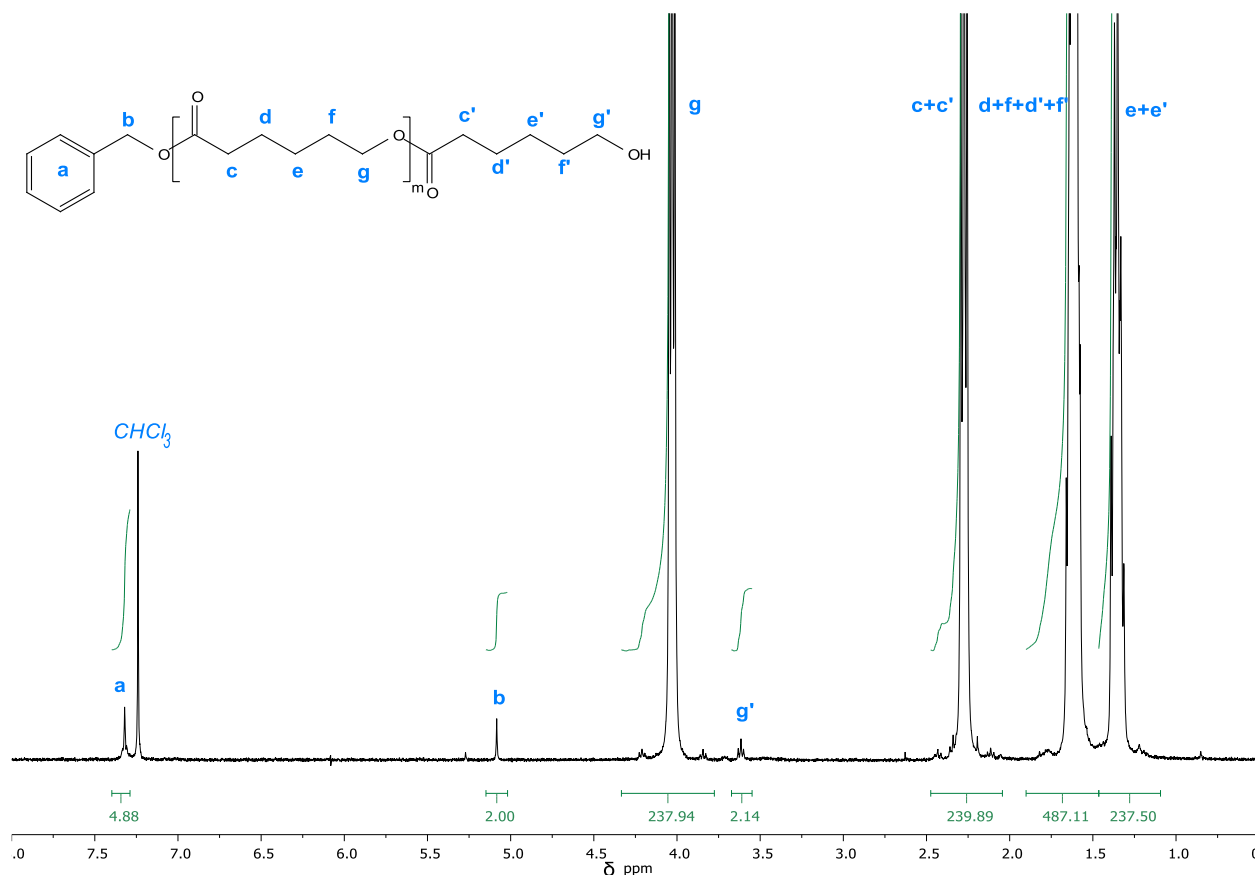

**Figure S4:** <sup>1</sup>H NMR spectrum of BnO—PCL polymer **PCL3**.

### Synthesis of poly(methyl ethylene phosphate)s

A preheated 30 ml glass ampoule was equipped with a magnetic stir bar, 1.63 g of MeOEP (1.18 ml, 11.8 mmol, 100 eq.) was placed into the ampoule and then the ampoule was filled with dry argon and closed with a septum. Then, 4.2 ml of CH<sub>2</sub>Cl<sub>2</sub> was added, then the reaction mixture was cooled to 5 °C, and a solution of 50 mg of [(BHT)Mg(μ-Obn)(THF)]<sub>2</sub> in 0.5 ml THF was added (resulting concentration of MeOEP was 2M). After 1 h of stirring, the reaction mixture was neutralized with an excess of acetic acid, the polymer solution was precipitated twice in diethyl ether and subsequently dried in vacuo. The yield was 1.17 g (72 %) for **PMeOEP2**, 1.26 g (77 %) for **PMeOEP1**. The <sup>1</sup>H and <sup>31</sup>P NMR spectra of the copolymers are presented in Figure S5.

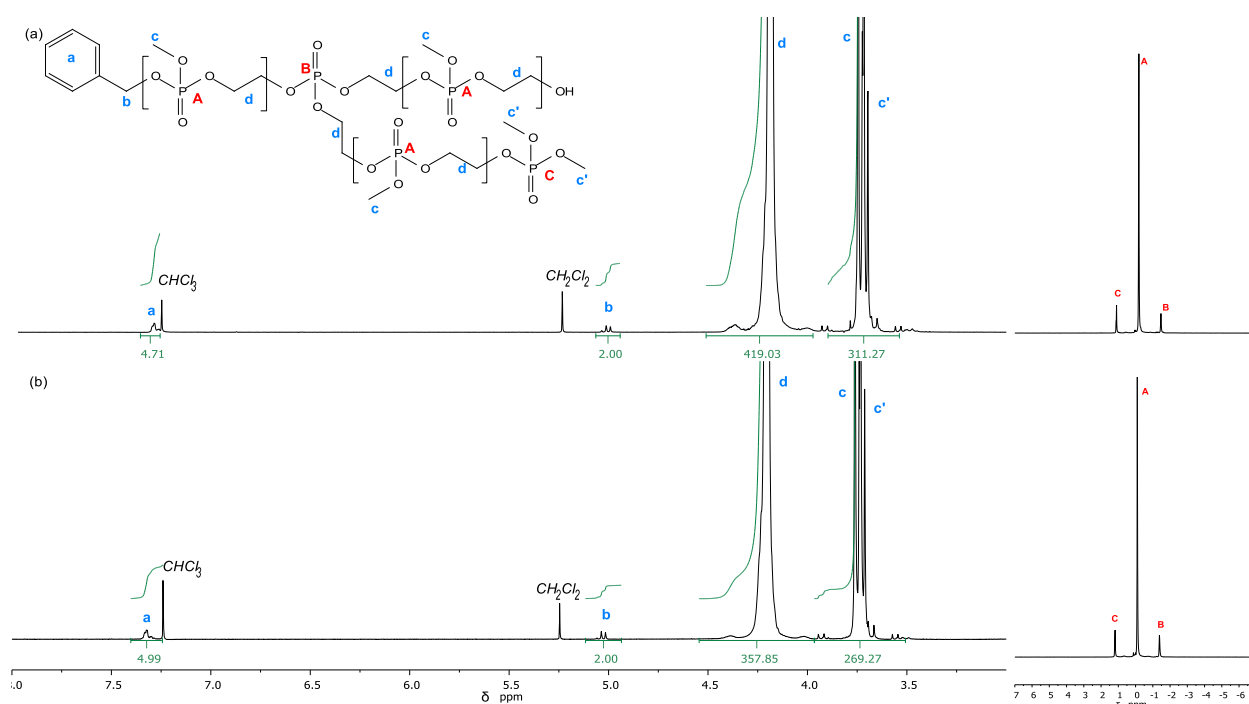

**Figure S5:**  $^1\text{H}$ ,  $^{31}\text{P}$  NMR spectra of BnO-PMeOEP polymers **PMeOEP2** (a), **PMeOEP1** (b).

#### Synthesis of BnO-PCL-b-PMEOEP copolymer 5% PMEOEP

CL (3.27 ml, 3.37 g, 29.5 mmol, 250 eq.) was placed into the preheated 50 ml glass ampule, equipped with a magnetic stir bar and septum, the ampule was filled with dry argon,  $\text{CH}_2\text{Cl}_2$  (10.5 ml) was added. The ampule was cooled to 5  $^\circ\text{C}$ , and a solution of 50 mg of  $[(\text{BHT})\text{Mg}(\mu\text{-Obn})(\text{THF})]_2$  ( $1.18 \times 10^{-4}$  mol, 1 eq.) in 1.0 ml THF was added (resulting concentration of CL was 2M).

After 4 h of stirring at room temperature, the ampule was cooled to 5  $^\circ\text{C}$ , and 0.32 g MeOEP (2.36 mmol, 0.24 ml, 20 eq.) was added. After 1 h of stirring at 5  $^\circ\text{C}$ , the reaction mixture was neutralized with an excess of acetic acid, polymer solution was diluted with  $\text{CH}_2\text{Cl}_2$ , precipitated twice in diethyl ether and subsequently dried in vacuo. The yield was 3.3 g (89 %). The  $^1\text{H}$  NMR spectra of the copolymer are presented in Figure S6a.

#### Synthesis of BnO-PCL-b-MeOEP copolymers (15% PMEOEP, 16% PMEOEP)

CL (3.27 ml, 3.37 g, 29.5 mmol, 250 eq.) was placed into the preheated 50 ml glass ampule, equipped with a magnetic stir bar and septum, the ampule was filled with dry argon,  $\text{CH}_2\text{Cl}_2$  (10.5 ml) was added. The ampule was cooled to 5  $^\circ\text{C}$ , and a solution of 50 mg of  $[(\text{BHT})\text{Mg}(\mu\text{-Obn})(\text{THF})]_2$  ( $1.18 \times 10^{-4}$  mol, 1 eq.) in 1.0 ml THF was added (resulting concentration of CL was 2M).

After 4 h of stirring at room temperature, the ampule was cooled to 5  $^\circ\text{C}$ , and 0.98 g MeOEP (7.08 mmol, 0.71 ml, 60 eq.) was added. After 6 h of stirring at 5  $^\circ\text{C}$ , the reaction mixture was neutralized with an excess of acetic acid, polymer solution was diluted with  $\text{CH}_2\text{Cl}_2$ , precipitated twice in diethyl ether and subsequently dried in vacuo. The yield was 3.2 g (73 %) for **15% PMEOEP**, 3.4 g (78 %) for **16% PMEOEP** copolymer. The  $^1\text{H}$  NMR spectra of the copolymers are presented in Figures S6b and S6c.

### **Synthesis of BnO—PCL—b—PMeOEP copolymer 6% PMeOEP**

CL (2.62 ml, 2.70 g, 23.6 mmol, 200 eq.) was placed into the preheated 50 ml glass ampule, equipped with a magnetic stir bar and septum, the ampule was filled with dry argon, CH<sub>2</sub>Cl<sub>2</sub> (8.5 ml) was added. The ampule was cooled to 5 °C, and a solution of 50 mg of [(BHT)Mg( $\mu$ -OBn)(THF)]<sub>2</sub> ( $1.18 \times 10^{-4}$  mol, 1 eq.) in 1.0 ml THF was added (resulting concentration of CL was 2M).

After 4 h of stirring at room temperature, the ampule was cooled to 5 °C, and 0.16 g MeOEP (1.18 mmol, 0.12 ml, 10 eq.) was added. After 6 h of stirring at 5 °C, the reaction mixture was neutralized with an excess of acetic acid, polymer solution was diluted with CH<sub>2</sub>Cl<sub>2</sub>, precipitated twice in diethyl ether and dried in vacuo. The yield was 2.5 g (87 %). The <sup>1</sup>H NMR spectra of the copolymer are presented in Figure S6d.

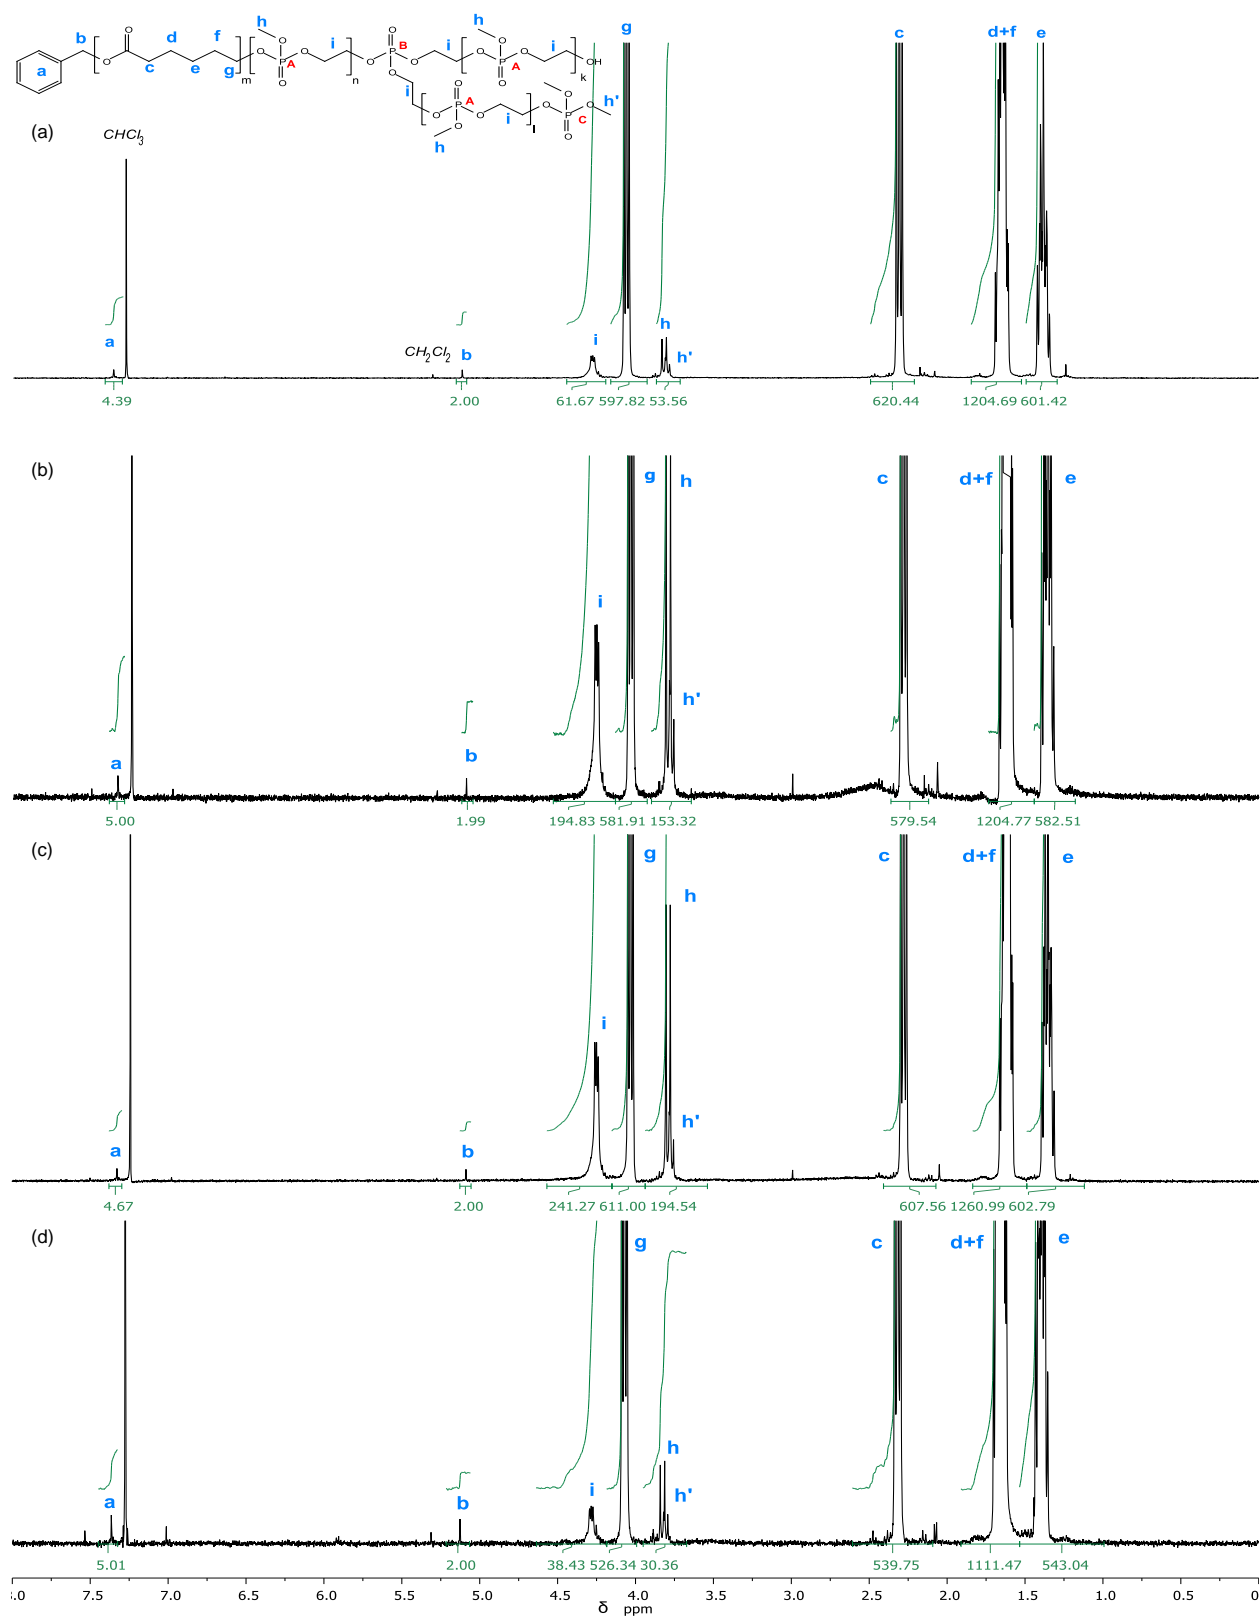

**Figure S6:**  $^1\text{H}$  NMR spectra of BnO-PCL-b-PMeOEP copolymers 5% PMeOEP (a), 15% PMeOEP (b), 16% PMeOEP (c), 6% PMeOEP (d).



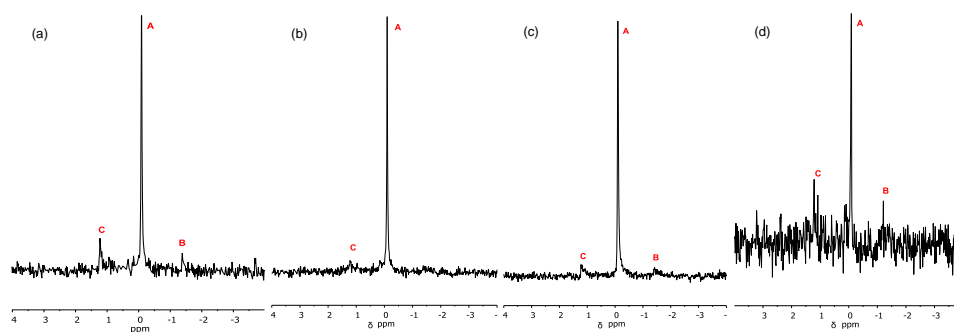

**Figure S7:**  $^{31}\text{P}$  NMR spectra of BnO—PCL—b—PMeOEP copolymers 5% PMeOEP (a), 15% PMeOEP (b), 16% PMeOEP (c), 6% PMeOEP (d), see reference on the Figure S6a.

### Synthesis of poly(L-lactide) PLA1

A preheated 30 ml glass ampoule, equipped with a magnetic stir bar and septum, was filled with dry argon. Afterward, 852 mg of LA ( $5.9 \times 10^{-3}$  mol, 50 eq.) was placed into the ampoule and then the ampoule was purged with dry argon and closed with a septum. Next, 1.6 ml of  $\text{CH}_2\text{Cl}_2$  was added, and after LA dissolution, a solution of 50 mg of  $[(\text{BHT})\text{Mg}(\mu\text{-OBn})(\text{THF})]_2$  in 0.5 ml THF ( $1.18 \times 10^{-4}$  mol, 1 eq.) was added (resulting concentration of LA was approx. 2M). After 1 h of stirring, the reaction mixture was neutralized with an excess of acetic acid, the polymer solution was precipitated twice in methanol and dried in vacuo. The yield was 0.58 g (68 %). The  $^1\text{H}$  NMR spectrum of polymer **PLA1** is presented in Figure S8a.

### Synthesis of poly(L-lactides) PLA3, PLA2

A preheated 30 ml glass ampoule, equipped with a magnetic stir bar and septum, was filled with dry argon. Afterward, 1.70 g of LA ( $1.2 \times 10^{-2}$  mol, 100 eq.) was placed into the ampoule and then the ampoule was purged with dry argon and closed with a septum. Next, 3.8 ml of  $\text{CH}_2\text{Cl}_2$  was added, and after LA dissolution, a solution of 50 mg of  $[(\text{BHT})\text{Mg}(\mu\text{-OBn})(\text{THF})]_2$  in 0.5 ml THF ( $1.18 \times 10^{-4}$  mol, 1 eq.) was added (resulting concentration of LA was approx. 2M). After 4 h of stirring, the reaction mixture was neutralized with an excess of acetic acid, polymer solution was diluted with  $\text{CH}_2\text{Cl}_2$  and precipitated twice in methanol and dried in vacuo. The yield was 1.38 g (81 %) for **PLA3**, 1.44 g (85 %) for **PLA2** sample. The  $^1\text{H}$  NMR spectra of polymers are presented in Figures S8b and S8c.

### Synthesis of poly(L-lactide) PLA5

A preheated 50 ml glass ampoule, equipped with a magnetic stir bar and septum, was filled with dry argon. Afterward, 6.80 g of LA ( $4.7 \times 10^{-2}$  mol, 400 eq.) was placed into the ampoule and then the ampoule was purged with dry argon and closed with a septum. Next, 16 ml of  $\text{CH}_2\text{Cl}_2$  was added, and after LA dissolution, a solution of 50 mg of  $[(\text{BHT})\text{Mg}(\mu\text{-OBn})(\text{THF})]_2$  in 1 ml THF ( $1.18 \times 10^{-4}$  mol, 1 eq.) was added (resulting concentration of LA was approx. 2M). After 8 h of stirring, the reaction mixture was neutralized with an excess of acetic acid, polymer solution was diluted with  $\text{CH}_2\text{Cl}_2$ , precipitated twice in methanol and dried in vacuo. The yield was 6.47 g (95 %). The  $^1\text{H}$  NMR spectrum of polymer **PLA5** is presented in Figure S8d.

### Synthesis of poly(L-lactide) PLA4

A preheated 100 ml glass ampoule, equipped with a magnetic stir bar and septum, was filled with dry argon. Afterward, 8.50 g of LA ( $5.9 \times 10^{-2}$  mol, 500 eq.) was placed into the ampule and then the ampule was purged with dry argon and closed with a septum. Next, 20 ml of  $\text{CH}_2\text{Cl}_2$  was added, and after LA dissolution, a solution of 50 mg of  $[(\text{BHT})\text{Mg}(\mu\text{-OBn})(\text{THF})]_2$  in 1 ml THF ( $1.18 \times 10^{-4}$  mol, 1 eq.) was added (resulting concentration of LA was approx. 2M). After 8 h of stirring, the reaction mixture was neutralized with an excess of acetic acid, the polymer solution was diluted with  $\text{CH}_2\text{Cl}_2$ , precipitated twice in methanol and dried in vacuo. The yield was 8.04 g (94 %). The  $^1\text{H}$  NMR spectrum of polymer **PLA4** is presented in Figure S8e.

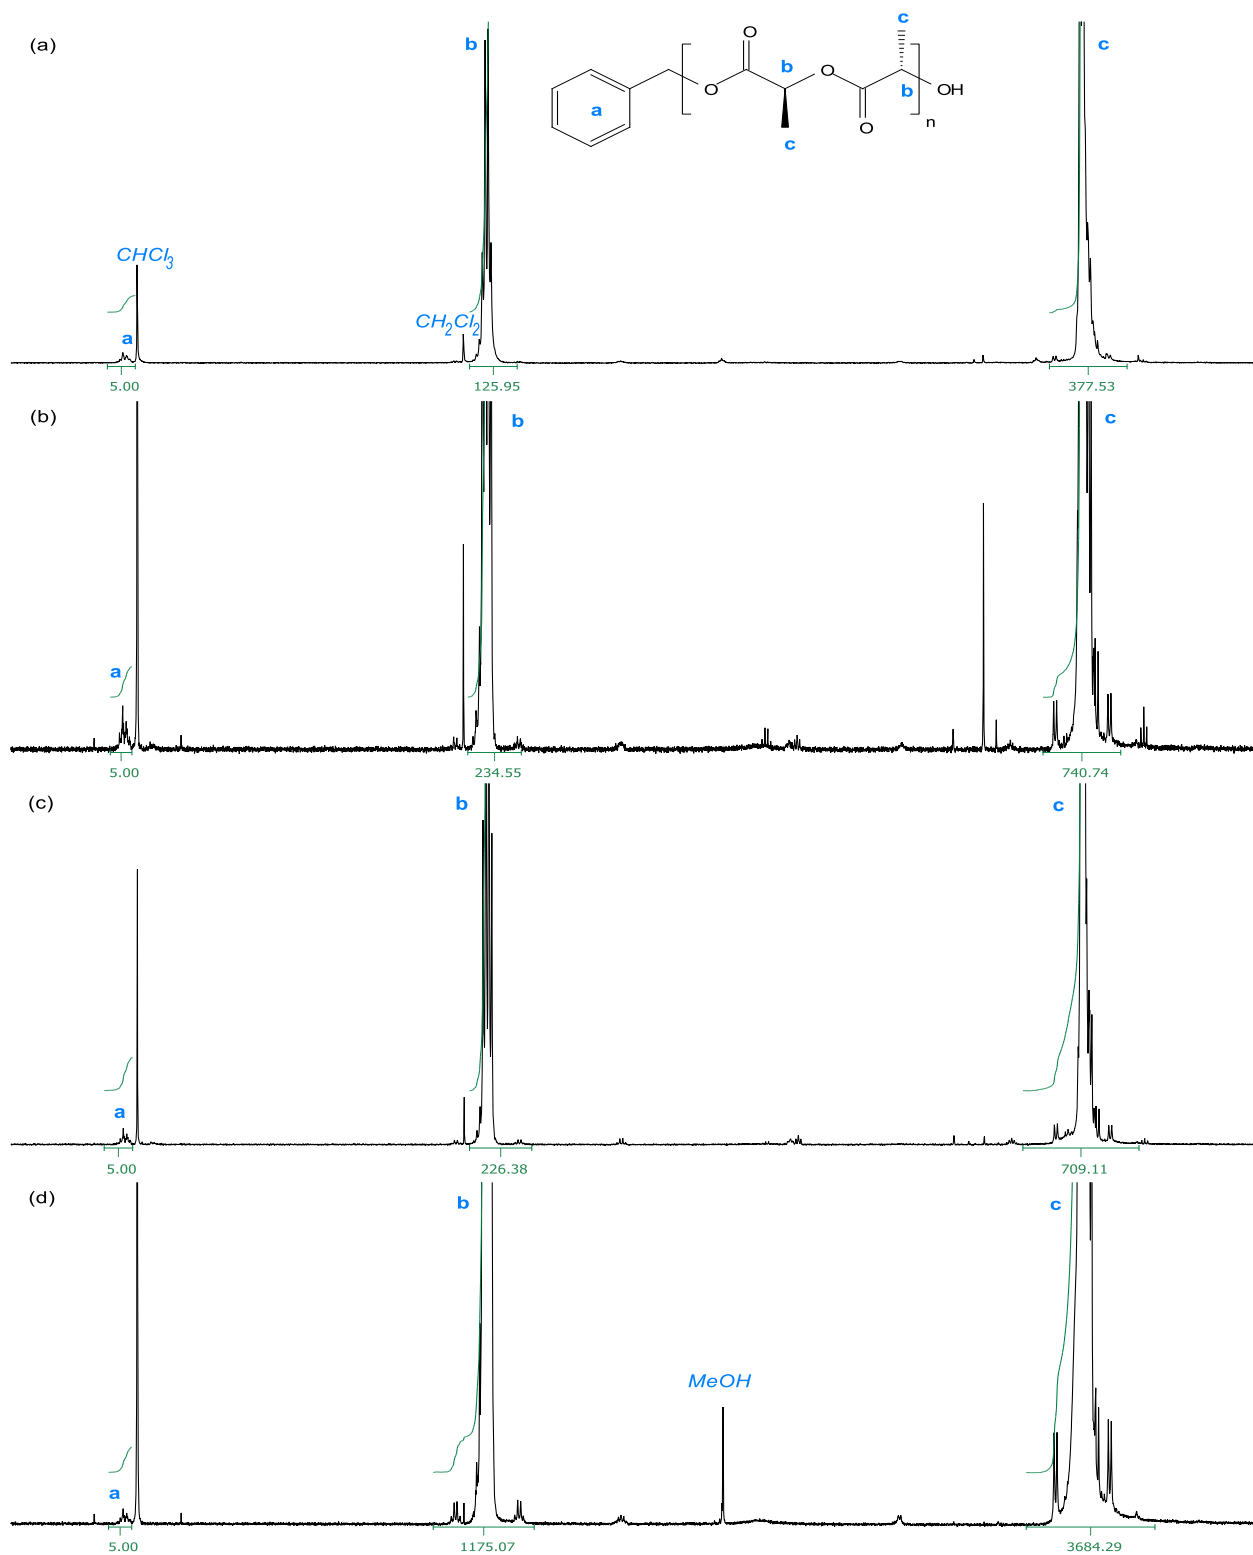

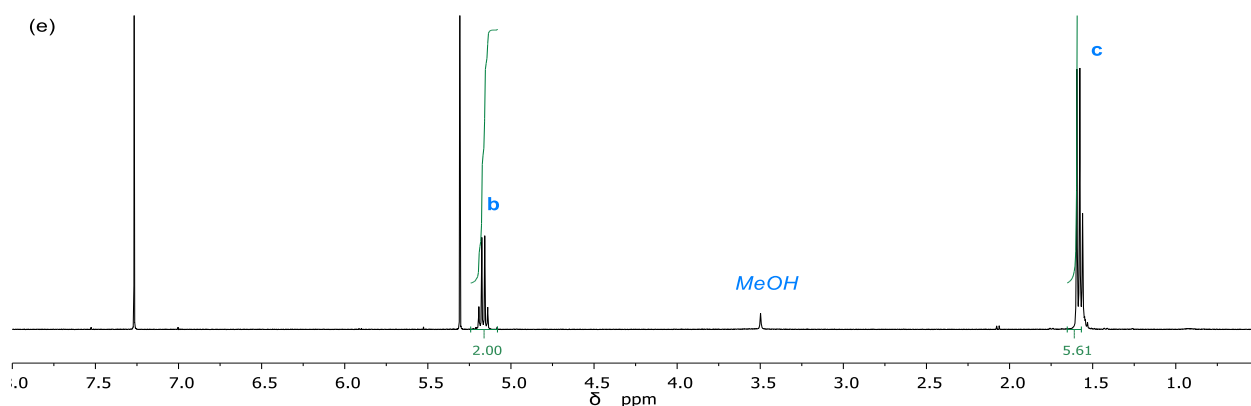

**Figure S8:**  $^1\text{H}$  NMR spectra of BnO–PLA polymers **PLA1** (a), **PLA3** (b), **PLA2** (c), **PLA5** (d), **PLA4** (e).

#### Synthesis of mPEG<sub>5000</sub>–b–PLA copolymer **PLA6**

A preheated 10 ml glass ampoule was equipped with a magnetic stir bar, 1.00 g mPEG<sub>5000</sub> (1 eq., 0.2 mmol) was placed into the ampoule and then the ampoule was filled with dry argon and closed with a septum. Then, 5.0 ml CH<sub>2</sub>Cl<sub>2</sub> was added, and after mPEG dissolution, 0.2 ml of 1M stock solution in THF of **M2** catalyst ( $2 \times 10^{-4}$  mol, 1 eq.) was added. The mixture was stirred for 4 hours.

Next, 11.5 g of LA (400 eq., 80 mmol) was placed in a 100 ml preheated dry glass ampoule with a magnetic stir bar. The ampoule was filled with dry argon and closed with a septum. Dry dichloromethane was added to LA up to 50 ml to provide approx. 1.5 M monomer concentration. After LA dissolution, the solution of the catalyst was added via syringe at room temperature and the reaction mixture was stirred for an additional 4 hours.

After that, the reaction mixture was neutralized with an excess of acetic acid, diluted with CH<sub>2</sub>Cl<sub>2</sub>, and it was precipitated twice in methanol and subsequently dried in vacuo. The yield was 9.3 g (74 %). The  $^1\text{H}$  NMR spectra of the copolymer are presented in Figure S9.

#### Synthesis of BnO–b–PMeOEP–b–PLA copolymer 31% PMeOEP

First, 1.70 g of LA (100 eq., 11.8 mmol) was placed in a 30 ml preheated dry glass ampoule with a magnetic stir bar. The ampoule was filled with dry argon and closed with a septum. Dry dichloromethane was added to LA up to 8 ml to provide approx. 1.5 M monomer concentration.

MeOEP (0.59 ml, 814 mg, 5.9 mmol, 50 eq.) was placed into the preheated 10 ml glass ampoule, equipped with a magnetic stir bar and septum, the ampoule was filled with dry argon, 1.9 ml of dry dichloromethane was added via syringe. The ampoule was cooled to 5 °C, and a solution of 50 mg of [(BHT)Mg( $\mu$ -OBn)(THF)]<sub>2</sub> ( $1.18 \times 10^{-4}$  mol, 1 eq.) in 0.5 ml THF was added (resulting concentration of MeOEP was 2M). After 5 min of stirring at 5 °C, the reaction mixture was added to LA solution at room temperature via syringe. After 4 h of stirring, the reaction mixture was neutralized with an excess of acetic acid, the polymer solution was diluted with CH<sub>2</sub>Cl<sub>2</sub>, precipitated twice in diethyl ether and dried in vacuo. The yield was 2.0 g (80 %). The  $^1\text{H}$  NMR spectrum of the copolymer is presented in Figure S10.

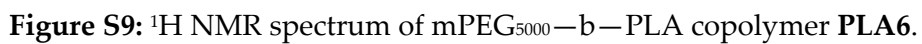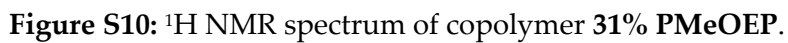

## S2. Calculations

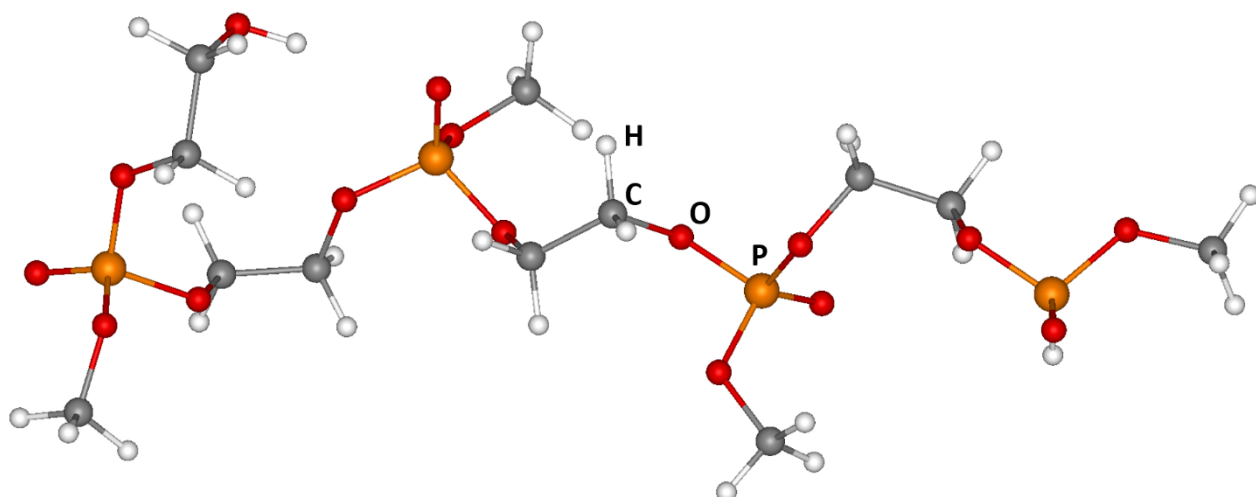

**Figure S11:** Calculated optimized structure of the MeOEP tetramer.

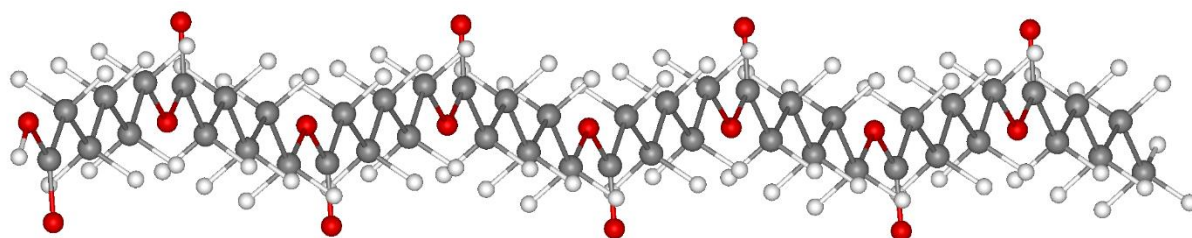

**Figure S12:** Calculated optimized structure of the CL octamer. Coloring of the atoms is the same as in Figure S11.

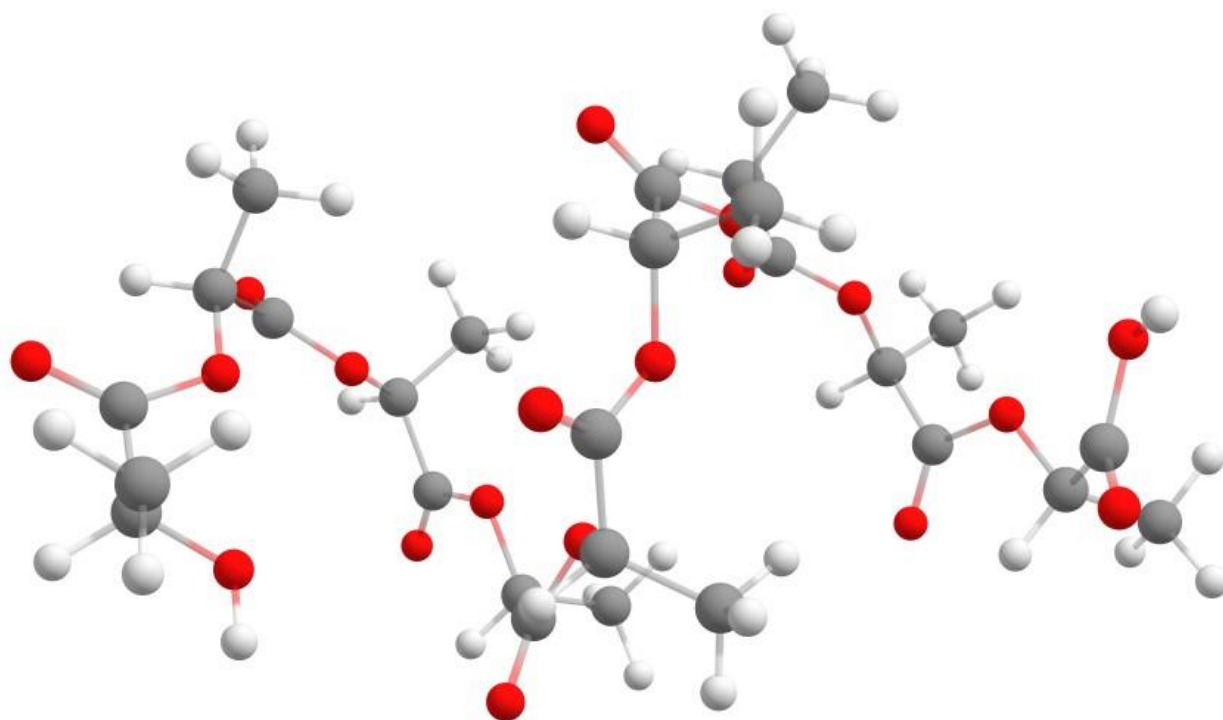

**Figure S13:** Calculated optimized structure of the LA nonamer. Coloring of the atoms is the same as in Figure S11.

**Table S1:** Harmonic frequencies ( $\text{cm}^{-1}$ ) and Raman scattering activities ( $\text{\AA}^4/\text{a.m.u.}$ ) for the MeOEP tetramer in the region  $100\text{--}3600\text{ cm}^{-1}$ . The data are presented as calculated, that is, without rounding.

| Mode | Harmonic frequencies, $\text{cm}^{-1}$ | Raman scattering activities, $\text{\AA}^4/\text{a.m.u.}$ |
|------|----------------------------------------|-----------------------------------------------------------|
| 21   | 100.26                                 | 0.246                                                     |
| 22   | 101.70                                 | 0.058                                                     |
| 23   | 109.87                                 | 0.645                                                     |
| 24   | 112.77                                 | 0.050                                                     |
| 25   | 115.17                                 | 0.104                                                     |
| 26   | 118.61                                 | 0.171                                                     |
| 27   | 133.07                                 | 0.301                                                     |
| 28   | 143.96                                 | 1.131                                                     |
| 29   | 153.65                                 | 0.168                                                     |
| 30   | 159.91                                 | 0.783                                                     |
| 31   | 164.17                                 | 0.320                                                     |
| 32   | 170.34                                 | 0.215                                                     |
| 33   | 177.70                                 | 0.210                                                     |
| 34   | 196.89                                 | 1.750                                                     |
| 35   | 208.82                                 | 1.095                                                     |
| 36   | 215.35                                 | 0.897                                                     |
| 37   | 218.28                                 | 0.339                                                     |
| 38   | 252.27                                 | 0.568                                                     |
| 39   | 269.25                                 | 0.799                                                     |
| 40   | 273.31                                 | 2.367                                                     |
| 41   | 281.90                                 | 1.392                                                     |

|    |         |        |
|----|---------|--------|
| 42 | 314.56  | 0.484  |
| 43 | 323.23  | 2.214  |
| 44 | 330.36  | 0.686  |
| 45 | 339.79  | 0.405  |
| 46 | 342.63  | 0.620  |
| 47 | 360.09  | 2.123  |
| 48 | 372.87  | 1.353  |
| 49 | 389.94  | 2.165  |
| 50 | 409.70  | 1.697  |
| 51 | 420.08  | 1.273  |
| 52 | 429.59  | 1.594  |
| 53 | 435.89  | 1.965  |
| 54 | 444.52  | 1.295  |
| 55 | 463.56  | 1.465  |
| 56 | 466.32  | 1.299  |
| 57 | 470.67  | 1.625  |
| 58 | 473.30  | 1.055  |
| 59 | 483.97  | 1.829  |
| 60 | 490.66  | 2.699  |
| 61 | 510.68  | 0.724  |
| 62 | 522.07  | 1.479  |
| 63 | 539.81  | 1.231  |
| 64 | 543.21  | 0.770  |
| 65 | 672.38  | 2.091  |
| 66 | 682.39  | 68.829 |
| 67 | 702.17  | 14.294 |
| 68 | 734.81  | 30.303 |
| 69 | 762.44  | 2.412  |
| 70 | 778.93  | 4.859  |
| 71 | 779.76  | 4.212  |
| 72 | 783.91  | 0.789  |
| 73 | 795.09  | 2.808  |
| 74 | 797.41  | 1.152  |
| 75 | 800.96  | 2.420  |
| 76 | 865.64  | 2.900  |
| 77 | 905.86  | 1.854  |
| 78 | 912.12  | 0.974  |
| 79 | 923.75  | 0.893  |
| 80 | 940.59  | 0.849  |
| 81 | 944.95  | 1.121  |
| 82 | 946.51  | 2.727  |
| 83 | 952.56  | 2.514  |
| 84 | 958.25  | 1.241  |
| 85 | 967.74  | 4.226  |
| 86 | 1015.67 | 3.367  |
| 87 | 1021.74 | 4.172  |
| 88 | 1026.27 | 6.118  |



|     |         |        |
|-----|---------|--------|
| 89  | 1034.05 | 1.295  |
| 90  | 1041.71 | 3.674  |
| 91  | 1047.59 | 5.087  |
| 92  | 1054.48 | 1.923  |
| 93  | 1056.22 | 1.095  |
| 94  | 1066.76 | 0.083  |
| 95  | 1073.23 | 2.189  |
| 96  | 1077.82 | 1.231  |
| 97  | 1086.69 | 2.962  |
| 98  | 1091.12 | 1.568  |
| 99  | 1101.99 | 0.967  |
| 100 | 1105.01 | 2.111  |
| 101 | 1107.16 | 2.495  |
| 102 | 1151.94 | 0.662  |
| 103 | 1152.56 | 0.614  |
| 104 | 1152.68 | 0.668  |
| 105 | 1152.73 | 0.799  |
| 106 | 1171.24 | 0.887  |
| 107 | 1174.17 | 0.784  |
| 108 | 1174.35 | 0.738  |
| 109 | 1174.54 | 1.546  |
| 110 | 1208.37 | 2.945  |
| 111 | 1240.87 | 4.069  |
| 112 | 1246.19 | 8.360  |
| 113 | 1248.44 | 6.109  |
| 114 | 1262.92 | 3.754  |
| 115 | 1267.20 | 13.529 |
| 116 | 1268.43 | 4.944  |
| 117 | 1269.32 | 17.002 |
| 118 | 1277.28 | 4.373  |
| 119 | 1280.16 | 15.301 |
| 120 | 1295.84 | 6.754  |
| 121 | 1297.04 | 9.766  |
| 122 | 1366.52 | 0.180  |
| 123 | 1368.54 | 0.476  |
| 124 | 1368.99 | 0.249  |
| 125 | 1370.25 | 0.247  |
| 126 | 1381.12 | 1.871  |
| 127 | 1389.56 | 1.098  |
| 128 | 1391.57 | 1.739  |
| 129 | 1394.15 | 0.930  |
| 130 | 1400.61 | 3.688  |
| 131 | 1440.17 | 1.510  |
| 132 | 1440.31 | 2.684  |
| 133 | 1440.77 | 0.691  |
| 134 | 1441.44 | 1.263  |
| 135 | 1447.43 | 8.548  |

|     |         |         |
|-----|---------|---------|
| 136 | 1451.54 | 5.277   |
| 137 | 1452.07 | 5.340   |
| 138 | 1458.56 | 4.326   |
| 139 | 1459.33 | 5.829   |
| 140 | 1459.59 | 5.125   |
| 141 | 1459.97 | 5.835   |
| 142 | 1460.76 | 5.812   |
| 143 | 1460.79 | 10.556  |
| 144 | 1462.81 | 2.792   |
| 145 | 1463.47 | 5.190   |
| 146 | 1464.60 | 5.395   |
| 147 | 1465.59 | 5.151   |
| 148 | 1467.53 | 5.795   |
| 149 | 1467.57 | 4.701   |
| 150 | 1468.83 | 6.465   |
| 151 | 2350.93 | 40.042  |
| 152 | 2928.71 | 132.032 |
| 153 | 2984.27 | 166.076 |
| 154 | 2989.25 | 151.069 |
| 155 | 2992.21 | 64.553  |
| 156 | 2993.13 | 157.262 |
| 157 | 2994.55 | 29.789  |
| 158 | 2996.43 | 131.809 |
| 159 | 2997.31 | 148.815 |
| 160 | 3002.53 | 244.427 |
| 161 | 3007.76 | 73.744  |
| 162 | 3008.45 | 151.811 |
| 163 | 3019.09 | 209.941 |
| 164 | 3031.90 | 140.184 |
| 165 | 3048.35 | 69.907  |
| 166 | 3048.43 | 44.096  |
| 167 | 3056.84 | 17.004  |
| 168 | 3061.06 | 19.550  |
| 169 | 3065.89 | 64.629  |
| 170 | 3066.77 | 55.228  |
| 171 | 3067.80 | 32.040  |
| 172 | 3068.39 | 54.049  |
| 173 | 3078.44 | 39.722  |
| 174 | 3079.48 | 39.129  |
| 175 | 3081.71 | 8.726   |
| 176 | 3092.84 | 76.479  |
| 177 | 3097.62 | 61.888  |
| 178 | 3097.70 | 80.183  |
| 179 | 3100.48 | 83.390  |

**Table S2:** Harmonic frequencies ( $\text{cm}^{-1}$ ) and Raman scattering activities ( $\text{\AA}^4/\text{a.m.u.}$ ) for the CL octamer in the region 100–3600  $\text{cm}^{-1}$ . The data are presented as calculated, that is, without rounding.

| Mode | Harmonic frequencies, $\text{cm}^{-1}$ | Raman scattering activities, $\text{\AA}^4/\text{a.m.u.}$ |
|------|----------------------------------------|-----------------------------------------------------------|
| 44   | 105.05                                 | 0.094                                                     |
| 45   | 106.68                                 | 0.014                                                     |
| 46   | 110.02                                 | 0.003                                                     |
| 47   | 112.03                                 | 0.019                                                     |
| 48   | 113.97                                 | 0.019                                                     |
| 49   | 117.41                                 | 0.017                                                     |
| 50   | 118.09                                 | 1.577                                                     |
| 51   | 119.75                                 | 0.020                                                     |
| 52   | 120.98                                 | 0.014                                                     |
| 53   | 121.47                                 | 0.018                                                     |
| 54   | 126.58                                 | 0.007                                                     |
| 55   | 128.19                                 | 0.011                                                     |
| 56   | 128.94                                 | 0.141                                                     |
| 57   | 129.61                                 | 0.003                                                     |
| 58   | 130.96                                 | 0.007                                                     |
| 59   | 133.00                                 | 0.015                                                     |
| 60   | 135.31                                 | 0.001                                                     |
| 61   | 137.16                                 | 0.037                                                     |
| 62   | 138.38                                 | 0.060                                                     |
| 63   | 143.60                                 | 0.016                                                     |
| 64   | 153.26                                 | 0.003                                                     |
| 65   | 158.18                                 | 0.030                                                     |
| 66   | 183.63                                 | 0.795                                                     |
| 67   | 185.72                                 | 0.112                                                     |
| 68   | 187.04                                 | 0.019                                                     |
| 69   | 187.63                                 | 0.001                                                     |
| 70   | 188.49                                 | 0.005                                                     |
| 71   | 189.47                                 | 0.002                                                     |
| 72   | 190.28                                 | 0.010                                                     |
| 73   | 190.98                                 | 0.001                                                     |
| 74   | 191.45                                 | 0.059                                                     |
| 75   | 196.24                                 | 0.024                                                     |
| 76   | 220.06                                 | 0.787                                                     |
| 77   | 223.50                                 | 0.158                                                     |
| 78   | 240.86                                 | 0.024                                                     |
| 79   | 242.29                                 | 0.008                                                     |
| 80   | 248.23                                 | 0.610                                                     |
| 81   | 254.06                                 | 0.584                                                     |
| 82   | 264.38                                 | 0.129                                                     |
| 83   | 275.07                                 | 0.273                                                     |
| 84   | 283.60                                 | 1.170                                                     |
| 85   | 296.60                                 | 1.849                                                     |
| 86   | 338.01                                 | 0.062                                                     |

|     |        |        |
|-----|--------|--------|
| 87  | 347.44 | 0.095  |
| 88  | 350.75 | 0.654  |
| 89  | 352.36 | 0.013  |
| 90  | 354.97 | 0.007  |
| 91  | 355.52 | 0.018  |
| 92  | 379.72 | 0.186  |
| 93  | 387.07 | 0.153  |
| 94  | 417.86 | 0.570  |
| 95  | 420.91 | 0.484  |
| 96  | 426.49 | 0.066  |
| 97  | 432.67 | 0.202  |
| 98  | 437.26 | 0.128  |
| 99  | 439.58 | 0.046  |
| 100 | 440.30 | 1.921  |
| 101 | 501.69 | 0.461  |
| 102 | 510.97 | 2.051  |
| 103 | 517.70 | 0.168  |
| 104 | 518.16 | 0.707  |
| 105 | 518.76 | 0.038  |
| 106 | 521.37 | 0.029  |
| 107 | 525.61 | 0.098  |
| 108 | 530.21 | 0.011  |
| 109 | 533.66 | 5.531  |
| 110 | 566.92 | 0.225  |
| 111 | 567.34 | 0.375  |
| 112 | 567.41 | 0.098  |
| 113 | 567.53 | 0.002  |
| 114 | 567.67 | 0.191  |
| 115 | 567.79 | 0.003  |
| 116 | 567.91 | 1.076  |
| 117 | 618.57 | 4.519  |
| 118 | 641.31 | 1.310  |
| 119 | 693.60 | 3.834  |
| 120 | 694.78 | 0.517  |
| 121 | 696.85 | 0.285  |
| 122 | 699.33 | 0.087  |
| 123 | 701.67 | 1.049  |
| 124 | 703.53 | 0.017  |
| 125 | 704.66 | 13.550 |
| 126 | 720.68 | 0.067  |
| 127 | 725.05 | 0.013  |
| 128 | 725.07 | 0.007  |
| 129 | 725.11 | 0.002  |
| 130 | 725.15 | 0.002  |
| 131 | 725.21 | 0.002  |
| 132 | 725.24 | 0.012  |
| 133 | 725.40 | 0.020  |

|     |         |        |
|-----|---------|--------|
| 134 | 751.91  | 0.032  |
| 135 | 754.95  | 0.005  |
| 136 | 755.44  | 0.002  |
| 137 | 756.17  | 0.000  |
| 138 | 756.98  | 0.005  |
| 139 | 757.82  | 0.012  |
| 140 | 758.50  | 0.004  |
| 141 | 758.96  | 0.475  |
| 142 | 829.13  | 0.153  |
| 143 | 829.81  | 0.011  |
| 144 | 830.87  | 0.007  |
| 145 | 832.11  | 0.019  |
| 146 | 833.39  | 0.005  |
| 147 | 834.49  | 0.010  |
| 148 | 835.26  | 0.052  |
| 149 | 839.35  | 0.184  |
| 150 | 856.51  | 15.029 |
| 151 | 879.31  | 1.088  |
| 152 | 893.21  | 48.146 |
| 153 | 896.09  | 0.277  |
| 154 | 900.32  | 6.215  |
| 155 | 905.22  | 0.743  |
| 156 | 910.01  | 2.889  |
| 157 | 913.85  | 1.007  |
| 158 | 916.52  | 5.406  |
| 159 | 949.04  | 0.308  |
| 160 | 949.46  | 0.039  |
| 161 | 949.99  | 19.741 |
| 162 | 950.10  | 0.719  |
| 163 | 950.85  | 0.007  |
| 164 | 951.60  | 0.006  |
| 165 | 951.81  | 0.022  |
| 166 | 952.24  | 0.003  |
| 167 | 952.67  | 0.011  |
| 168 | 954.26  | 1.391  |
| 169 | 956.88  | 0.066  |
| 170 | 958.62  | 0.213  |
| 171 | 959.16  | 0.152  |
| 172 | 960.70  | 0.173  |
| 173 | 961.38  | 0.823  |
| 174 | 1006.33 | 0.287  |
| 175 | 1013.74 | 2.107  |
| 176 | 1018.43 | 1.323  |
| 177 | 1019.68 | 0.067  |
| 178 | 1021.72 | 1.055  |
| 179 | 1024.14 | 0.636  |
| 180 | 1026.42 | 9.148  |

|     |         |        |
|-----|---------|--------|
| 181 | 1027.95 | 67.564 |
| 182 | 1029.72 | 42.831 |
| 183 | 1032.45 | 0.309  |
| 184 | 1032.87 | 0.102  |
| 185 | 1033.37 | 0.380  |
| 186 | 1033.44 | 0.459  |
| 187 | 1033.77 | 0.002  |
| 188 | 1033.81 | 0.033  |
| 189 | 1051.98 | 5.541  |
| 190 | 1055.83 | 6.155  |
| 191 | 1059.14 | 4.308  |
| 192 | 1060.37 | 20.902 |
| 193 | 1060.48 | 2.484  |
| 194 | 1060.57 | 8.286  |
| 195 | 1060.60 | 0.257  |
| 196 | 1060.69 | 0.071  |
| 197 | 1060.72 | 0.108  |
| 198 | 1081.15 | 8.607  |
| 199 | 1095.28 | 1.058  |
| 200 | 1095.90 | 1.806  |
| 201 | 1096.78 | 0.056  |
| 202 | 1097.66 | 12.844 |
| 203 | 1098.31 | 0.008  |
| 204 | 1098.59 | 93.810 |
| 205 | 1104.96 | 0.792  |
| 206 | 1105.23 | 0.008  |
| 207 | 1105.61 | 0.106  |
| 208 | 1106.04 | 0.076  |
| 209 | 1106.43 | 0.035  |
| 210 | 1106.71 | 1.784  |
| 211 | 1107.66 | 0.884  |
| 212 | 1109.27 | 1.248  |
| 213 | 1109.44 | 10.723 |
| 214 | 1116.30 | 6.983  |
| 215 | 1140.27 | 22.350 |
| 216 | 1141.88 | 0.027  |
| 217 | 1143.73 | 0.973  |
| 218 | 1145.45 | 0.074  |
| 219 | 1146.84 | 0.385  |
| 220 | 1147.94 | 0.030  |
| 221 | 1148.76 | 0.940  |
| 222 | 1174.97 | 0.446  |
| 223 | 1175.05 | 0.023  |
| 224 | 1175.15 | 0.062  |
| 225 | 1175.27 | 0.166  |
| 226 | 1175.37 | 0.035  |
| 227 | 1175.44 | 3.612  |

|     |         |        |
|-----|---------|--------|
| 228 | 1175.77 | 1.374  |
| 229 | 1203.79 | 1.279  |
| 230 | 1231.21 | 1.620  |
| 231 | 1236.36 | 0.221  |
| 232 | 1236.63 | 0.024  |
| 233 | 1237.00 | 0.016  |
| 234 | 1237.37 | 0.128  |
| 235 | 1237.67 | 0.002  |
| 236 | 1237.83 | 0.780  |
| 237 | 1241.57 | 4.145  |
| 238 | 1241.64 | 0.190  |
| 239 | 1241.75 | 0.318  |
| 240 | 1241.88 | 0.083  |
| 241 | 1242.00 | 0.080  |
| 242 | 1242.09 | 0.344  |
| 243 | 1242.44 | 0.559  |
| 244 | 1250.45 | 0.341  |
| 245 | 1270.61 | 1.409  |
| 246 | 1270.87 | 1.912  |
| 247 | 1287.06 | 45.780 |
| 248 | 1287.18 | 5.206  |
| 249 | 1287.38 | 2.658  |
| 250 | 1287.61 | 0.908  |
| 251 | 1287.84 | 0.869  |
| 252 | 1288.03 | 0.515  |
| 253 | 1288.17 | 1.483  |
| 254 | 1295.19 | 2.713  |
| 255 | 1296.49 | 0.007  |
| 256 | 1298.38 | 0.189  |
| 257 | 1300.53 | 0.068  |
| 258 | 1302.61 | 0.030  |
| 259 | 1304.14 | 1.574  |
| 260 | 1309.31 | 2.577  |
| 261 | 1309.47 | 0.487  |
| 262 | 1309.56 | 0.704  |
| 263 | 1309.68 | 1.748  |
| 264 | 1309.81 | 1.059  |
| 265 | 1309.90 | 4.774  |
| 266 | 1309.94 | 2.495  |
| 267 | 1310.31 | 2.289  |
| 268 | 1313.58 | 4.476  |
| 269 | 1314.31 | 14.440 |
| 270 | 1314.38 | 14.655 |
| 271 | 1314.43 | 3.228  |
| 272 | 1314.49 | 1.042  |
| 273 | 1314.54 | 0.528  |
| 274 | 1314.59 | 1.675  |

|     |         |        |
|-----|---------|--------|
| 275 | 1315.31 | 0.516  |
| 276 | 1315.65 | 5.323  |
| 277 | 1316.28 | 1.875  |
| 278 | 1349.16 | 0.104  |
| 279 | 1350.40 | 0.012  |
| 280 | 1352.17 | 0.021  |
| 281 | 1354.17 | 0.073  |
| 282 | 1356.05 | 0.019  |
| 283 | 1357.44 | 1.254  |
| 284 | 1361.21 | 0.672  |
| 285 | 1363.55 | 0.601  |
| 286 | 1369.00 | 0.143  |
| 287 | 1373.69 | 0.654  |
| 288 | 1373.93 | 0.018  |
| 289 | 1374.19 | 0.063  |
| 290 | 1374.40 | 0.084  |
| 291 | 1374.53 | 0.226  |
| 292 | 1374.60 | 1.218  |
| 293 | 1377.60 | 0.236  |
| 294 | 1379.82 | 0.712  |
| 295 | 1388.82 | 35.663 |
| 296 | 1389.23 | 0.485  |
| 297 | 1389.81 | 3.051  |
| 298 | 1390.47 | 0.275  |
| 299 | 1391.12 | 0.818  |
| 300 | 1391.62 | 0.254  |
| 301 | 1391.91 | 2.116  |
| 302 | 1421.18 | 5.499  |
| 303 | 1422.04 | 4.986  |
| 304 | 1422.97 | 8.556  |
| 305 | 1422.99 | 0.077  |
| 306 | 1422.99 | 19.601 |
| 307 | 1423.01 | 0.102  |
| 308 | 1423.01 | 0.971  |
| 309 | 1423.02 | 1.642  |
| 310 | 1451.19 | 18.693 |
| 311 | 1453.80 | 3.534  |
| 312 | 1453.84 | 0.049  |
| 313 | 1453.88 | 1.819  |
| 314 | 1453.92 | 1.315  |
| 315 | 1453.96 | 0.285  |
| 316 | 1454.00 | 48.869 |
| 317 | 1454.04 | 66.241 |
| 318 | 1455.37 | 0.509  |
| 319 | 1459.13 | 24.802 |
| 320 | 1459.15 | 0.032  |
| 321 | 1459.18 | 0.726  |



|     |         |         |
|-----|---------|---------|
| 322 | 1459.24 | 0.112   |
| 323 | 1459.30 | 0.048   |
| 324 | 1459.34 | 1.109   |
| 325 | 1459.46 | 3.331   |
| 326 | 1465.28 | 4.854   |
| 327 | 1467.90 | 2.284   |
| 328 | 1471.71 | 3.643   |
| 329 | 1471.80 | 0.025   |
| 330 | 1471.93 | 0.508   |
| 331 | 1472.05 | 0.053   |
| 332 | 1472.21 | 1.256   |
| 333 | 1472.32 | 0.500   |
| 334 | 1472.40 | 13.730  |
| 335 | 1478.60 | 0.576   |
| 336 | 1484.03 | 1.341   |
| 337 | 1484.09 | 0.005   |
| 338 | 1484.15 | 0.224   |
| 339 | 1484.22 | 0.016   |
| 340 | 1484.29 | 0.060   |
| 341 | 1484.36 | 0.075   |
| 342 | 1484.40 | 0.644   |
| 343 | 1745.65 | 0.236   |
| 344 | 1745.69 | 0.312   |
| 345 | 1745.78 | 0.522   |
| 346 | 1745.90 | 1.980   |
| 347 | 1746.04 | 0.041   |
| 348 | 1746.18 | 30.151  |
| 349 | 1746.47 | 15.942  |
| 350 | 1768.00 | 10.214  |
| 351 | 2960.29 | 129.047 |
| 352 | 2966.93 | 118.291 |
| 353 | 2967.07 | 97.111  |
| 354 | 2967.10 | 142.600 |
| 355 | 2967.11 | 185.422 |
| 356 | 2967.12 | 60.214  |
| 357 | 2967.19 | 85.635  |
| 358 | 2967.78 | 117.207 |
| 359 | 2974.13 | 61.425  |
| 360 | 2981.41 | 215.857 |
| 361 | 2986.93 | 140.620 |
| 362 | 2988.18 | 70.071  |
| 363 | 2988.45 | 2.714   |
| 364 | 2988.48 | 9.344   |
| 365 | 2988.52 | 35.928  |
| 366 | 2988.56 | 45.733  |
| 367 | 2988.59 | 218.149 |
| 368 | 2988.89 | 104.901 |

|     |         |          |
|-----|---------|----------|
| 369 | 2989.92 | 253.786  |
| 370 | 2991.35 | 1130.695 |
| 371 | 2991.41 | 693.490  |
| 372 | 2991.47 | 70.810   |
| 373 | 2991.53 | 32.395   |
| 374 | 2991.60 | 16.332   |
| 375 | 2991.65 | 6.483    |
| 376 | 2992.12 | 217.968  |
| 377 | 2996.75 | 101.072  |
| 378 | 2996.98 | 87.071   |
| 379 | 2997.00 | 105.688  |
| 380 | 2997.02 | 112.524  |
| 381 | 2997.04 | 95.181   |
| 382 | 2997.07 | 101.024  |
| 383 | 2997.44 | 21.549   |
| 384 | 2997.88 | 105.851  |
| 385 | 2998.04 | 6.797    |
| 386 | 2998.14 | 8.639    |
| 387 | 2998.27 | 2.798    |
| 388 | 2998.44 | 13.689   |
| 389 | 2998.58 | 37.665   |
| 390 | 2998.69 | 182.147  |
| 391 | 3001.43 | 32.414   |
| 392 | 3004.61 | 120.490  |
| 393 | 3004.69 | 10.458   |
| 394 | 3004.83 | 9.329    |
| 395 | 3004.97 | 1.774    |
| 396 | 3005.14 | 2.300    |
| 397 | 3005.25 | 0.819    |
| 398 | 3005.96 | 14.672   |
| 399 | 3009.72 | 1.155    |
| 400 | 3019.64 | 20.501   |
| 401 | 3019.80 | 42.696   |
| 402 | 3019.82 | 10.331   |
| 403 | 3019.87 | 0.882    |
| 404 | 3019.91 | 1.149    |
| 405 | 3019.96 | 5.806    |
| 406 | 3020.04 | 69.782   |
| 407 | 3020.18 | 13.598   |
| 408 | 3024.82 | 81.801   |
| 409 | 3025.43 | 22.366   |
| 410 | 3025.47 | 4.505    |
| 411 | 3025.51 | 82.069   |
| 412 | 3025.54 | 5.633    |
| 413 | 3025.60 | 239.102  |
| 414 | 3025.66 | 155.203  |
| 415 | 3046.16 | 8.008    |

|     |         |         |
|-----|---------|---------|
| 416 | 3046.55 | 10.958  |
| 417 | 3046.99 | 2.477   |
| 418 | 3047.03 | 0.184   |
| 419 | 3047.12 | 6.402   |
| 420 | 3047.18 | 0.410   |
| 421 | 3047.28 | 28.461  |
| 422 | 3047.70 | 10.269  |
| 423 | 3052.34 | 22.695  |
| 424 | 3054.02 | 0.421   |
| 425 | 3054.33 | 0.031   |
| 426 | 3054.47 | 0.044   |
| 427 | 3054.62 | 0.028   |
| 428 | 3054.81 | 0.256   |
| 429 | 3054.83 | 113.822 |
| 430 | 3055.00 | 0.008   |
| 431 | 3055.22 | 0.725   |

**Table S3:** Harmonic frequencies ( $\text{cm}^{-1}$ ) and Raman scattering activities ( $\text{\AA}^4/\text{a.m.u.}$ ) for the LA nonamer in the region  $100\text{--}3600\text{ cm}^{-1}$ . The data are presented as calculated, that is, without rounding.

| Mode | Harmonic frequencies, $\text{cm}^{-1}$ | Raman scattering activities, $\text{\AA}^4/\text{a.m.u.}$ |
|------|----------------------------------------|-----------------------------------------------------------|
| 28   | 101.79                                 | 0.408                                                     |
| 29   | 108.57                                 | 0.270                                                     |
| 30   | 117.72                                 | 0.110                                                     |
| 31   | 129.13                                 | 0.106                                                     |
| 32   | 141.39                                 | 0.849                                                     |
| 33   | 155.14                                 | 1.633                                                     |
| 34   | 192.94                                 | 1.305                                                     |
| 35   | 196.87                                 | 4.367                                                     |
| 36   | 198.37                                 | 1.616                                                     |
| 37   | 199.74                                 | 2.144                                                     |
| 38   | 201.68                                 | 1.544                                                     |
| 39   | 205.84                                 | 0.563                                                     |
| 40   | 206.11                                 | 0.265                                                     |
| 41   | 209.81                                 | 0.745                                                     |
| 42   | 222.41                                 | 0.355                                                     |
| 43   | 224.58                                 | 0.060                                                     |
| 44   | 225.66                                 | 0.089                                                     |
| 45   | 227.77                                 | 0.130                                                     |
| 46   | 230.08                                 | 0.127                                                     |
| 47   | 230.78                                 | 0.095                                                     |
| 48   | 232.98                                 | 0.229                                                     |
| 49   | 234.49                                 | 0.078                                                     |
| 50   | 236.08                                 | 0.475                                                     |
| 51   | 238.32                                 | 0.630                                                     |
| 52   | 244.66                                 | 0.126                                                     |

|    |        |        |
|----|--------|--------|
| 53 | 246.07 | 0.802  |
| 54 | 253.20 | 0.287  |
| 55 | 267.68 | 0.146  |
| 56 | 280.20 | 0.708  |
| 57 | 286.08 | 5.963  |
| 58 | 287.77 | 0.229  |
| 59 | 289.27 | 0.549  |
| 60 | 295.81 | 0.890  |
| 61 | 298.25 | 1.787  |
| 62 | 362.49 | 0.927  |
| 63 | 364.74 | 0.501  |
| 64 | 366.52 | 0.685  |
| 65 | 371.50 | 0.897  |
| 66 | 380.82 | 0.153  |
| 67 | 391.15 | 0.895  |
| 68 | 404.05 | 0.301  |
| 69 | 411.43 | 0.335  |
| 70 | 421.28 | 0.547  |
| 71 | 458.88 | 0.053  |
| 72 | 468.11 | 0.108  |
| 73 | 482.41 | 0.159  |
| 74 | 499.82 | 0.603  |
| 75 | 516.11 | 0.833  |
| 76 | 520.19 | 11.934 |
| 77 | 525.52 | 0.774  |
| 78 | 527.65 | 0.636  |
| 79 | 530.92 | 0.680  |
| 80 | 583.95 | 1.229  |
| 81 | 614.52 | 3.458  |
| 82 | 620.75 | 0.620  |
| 83 | 622.73 | 0.272  |
| 84 | 624.35 | 1.971  |
| 85 | 631.83 | 0.253  |
| 86 | 648.63 | 0.971  |
| 87 | 670.94 | 0.140  |
| 88 | 694.16 | 3.522  |
| 89 | 714.86 | 3.024  |
| 90 | 728.13 | 0.198  |
| 91 | 732.70 | 1.165  |
| 92 | 733.97 | 0.118  |
| 93 | 735.22 | 0.333  |
| 94 | 736.21 | 0.432  |
| 95 | 737.52 | 0.101  |
| 96 | 738.70 | 0.444  |
| 97 | 740.63 | 0.890  |
| 98 | 745.16 | 0.998  |
| 99 | 799.82 | 4.940  |

|     |         |        |
|-----|---------|--------|
| 100 | 837.98  | 50.406 |
| 101 | 841.31  | 0.338  |
| 102 | 846.00  | 4.515  |
| 103 | 849.47  | 2.735  |
| 104 | 854.17  | 2.871  |
| 105 | 855.89  | 1.783  |
| 106 | 860.45  | 1.206  |
| 107 | 862.03  | 0.221  |
| 108 | 869.77  | 0.825  |
| 109 | 873.65  | 0.507  |
| 110 | 878.50  | 0.568  |
| 111 | 891.54  | 0.772  |
| 112 | 903.50  | 5.877  |
| 113 | 914.22  | 7.059  |
| 114 | 924.66  | 1.276  |
| 115 | 932.18  | 0.082  |
| 116 | 936.54  | 1.249  |
| 117 | 992.21  | 3.384  |
| 118 | 993.77  | 1.929  |
| 119 | 998.72  | 1.983  |
| 120 | 1004.50 | 5.455  |
| 121 | 1010.58 | 1.580  |
| 122 | 1015.92 | 0.096  |
| 123 | 1020.93 | 2.540  |
| 124 | 1025.25 | 5.204  |
| 125 | 1029.79 | 2.299  |
| 126 | 1033.64 | 4.368  |
| 127 | 1041.26 | 0.119  |
| 128 | 1048.84 | 1.280  |
| 129 | 1055.69 | 1.529  |
| 130 | 1057.27 | 2.230  |
| 131 | 1057.67 | 0.993  |
| 132 | 1059.01 | 0.663  |
| 133 | 1062.35 | 1.310  |
| 134 | 1068.32 | 4.306  |
| 135 | 1103.87 | 15.674 |
| 136 | 1104.38 | 6.517  |
| 137 | 1105.71 | 1.822  |
| 138 | 1108.23 | 2.084  |
| 139 | 1111.42 | 2.162  |
| 140 | 1113.56 | 0.736  |
| 141 | 1114.54 | 1.534  |
| 142 | 1116.20 | 0.773  |
| 143 | 1117.83 | 2.245  |
| 144 | 1164.70 | 2.407  |
| 145 | 1166.10 | 2.957  |
| 146 | 1230.57 | 6.102  |

|     |         |       |
|-----|---------|-------|
| 147 | 1232.33 | 0.184 |
| 148 | 1235.54 | 2.482 |
| 149 | 1238.31 | 1.442 |
| 150 | 1238.88 | 1.947 |
| 151 | 1241.10 | 0.735 |
| 152 | 1241.35 | 1.839 |
| 153 | 1263.99 | 4.015 |
| 154 | 1302.07 | 1.585 |
| 155 | 1303.22 | 0.607 |
| 156 | 1303.81 | 2.824 |
| 157 | 1305.18 | 2.962 |
| 158 | 1305.91 | 9.835 |
| 159 | 1307.09 | 6.963 |
| 160 | 1308.55 | 0.637 |
| 161 | 1310.23 | 1.721 |
| 162 | 1315.91 | 3.876 |
| 163 | 1330.70 | 3.786 |
| 164 | 1334.29 | 6.947 |
| 165 | 1340.89 | 3.540 |
| 166 | 1342.25 | 1.590 |
| 167 | 1342.81 | 2.782 |
| 168 | 1344.40 | 5.469 |
| 169 | 1345.39 | 6.523 |
| 170 | 1345.82 | 2.622 |
| 171 | 1346.48 | 5.892 |
| 172 | 1361.48 | 0.319 |
| 173 | 1366.38 | 0.314 |
| 174 | 1366.43 | 0.493 |
| 175 | 1367.03 | 0.197 |
| 176 | 1367.70 | 0.190 |
| 177 | 1368.27 | 0.415 |
| 178 | 1368.31 | 0.446 |
| 179 | 1368.99 | 1.087 |
| 180 | 1369.41 | 0.970 |
| 181 | 1385.10 | 2.672 |
| 182 | 1455.15 | 5.051 |
| 183 | 1455.76 | 4.877 |
| 184 | 1456.17 | 5.069 |
| 185 | 1456.60 | 5.717 |
| 186 | 1456.86 | 3.983 |
| 187 | 1456.94 | 4.448 |
| 188 | 1456.98 | 3.141 |
| 189 | 1458.45 | 5.901 |
| 190 | 1458.49 | 4.544 |
| 191 | 1462.70 | 2.551 |
| 192 | 1462.83 | 4.165 |
| 193 | 1463.15 | 4.128 |

|     |         |         |
|-----|---------|---------|
| 194 | 1463.18 | 2.734   |
| 195 | 1463.37 | 3.179   |
| 196 | 1463.52 | 1.710   |
| 197 | 1463.63 | 4.443   |
| 198 | 1464.00 | 4.267   |
| 199 | 1468.95 | 1.902   |
| 200 | 1740.98 | 8.888   |
| 201 | 1745.14 | 7.942   |
| 202 | 1747.17 | 6.007   |
| 203 | 1747.91 | 2.607   |
| 204 | 1749.17 | 4.573   |
| 205 | 1749.44 | 12.508  |
| 206 | 1750.66 | 18.513  |
| 207 | 1752.04 | 29.290  |
| 208 | 1766.82 | 15.369  |
| 209 | 2964.81 | 135.884 |
| 210 | 2996.43 | 183.760 |
| 211 | 3008.93 | 37.460  |
| 212 | 3009.33 | 127.138 |
| 213 | 3009.52 | 292.387 |
| 214 | 3009.98 | 139.963 |
| 215 | 3011.15 | 213.799 |
| 216 | 3011.53 | 31.400  |
| 217 | 3011.96 | 226.675 |
| 218 | 3012.36 | 243.823 |
| 219 | 3070.94 | 97.529  |
| 220 | 3071.13 | 49.666  |
| 221 | 3072.01 | 45.951  |
| 222 | 3073.54 | 64.237  |
| 223 | 3074.43 | 68.703  |
| 224 | 3075.31 | 74.599  |
| 225 | 3075.45 | 49.108  |
| 226 | 3076.23 | 79.022  |
| 227 | 3078.68 | 78.003  |
| 228 | 3087.76 | 34.529  |
| 229 | 3087.89 | 27.622  |
| 230 | 3088.03 | 106.919 |
| 231 | 3088.25 | 49.593  |
| 232 | 3089.72 | 92.248  |
| 233 | 3089.82 | 35.076  |
| 234 | 3090.43 | 58.690  |
| 235 | 3093.74 | 39.389  |
| 236 | 3094.79 | 68.288  |
| 237 | 3100.45 | 39.159  |
| 238 | 3100.62 | 40.776  |
| 239 | 3103.49 | 33.366  |
| 240 | 3104.93 | 43.297  |

|     |         |        |
|-----|---------|--------|
| 241 | 3106.01 | 36.364 |
| 242 | 3106.28 | 29.486 |
| 243 | 3106.95 | 50.626 |
| 244 | 3109.89 | 39.634 |

**Table S4:** Four-exponential (4z) basis set contraction patterns.

| Atom | Orbital basis |             |
|------|---------------|-------------|
|      | Primitive     | Contracted  |
| H    | (8s3p2d)      | [4s3p2d]    |
| C    | (14s8p3d2f)   | [8s4p3d2f]  |
| O    | (14s8p3d2f)   | [8s4p3d2f]  |
| P    | (20s15p3d2f)  | [13s9p3d2f] |
